# Supplementary material for: Green chemistry approach to the synthesis of 2-aryl/heteroaryl substituted 2,3-dihydroquinazolin-4(1H)-ones using lemon juice under concentrated solar radiations as a renewable source
Source: Royal Society of Chemistry journal article supplement (doi:10.1039/d4ra05772d), 2024-01-01

**Green chemistry approach to the synthesis of 2-aryl/heteroaryl substituted 2,3-dihydroquinazolin-4(1*H*)-ones using lemon juice under concentrated solar radiations as a renewable source**

**Rehana A. Khan, Vishnu A. Adole\*, Thansing B. Pawar, Babu S. Jagdale**

Department of Chemistry, Mahatma Gandhi Vidyamandir's Loknete Vyankatrao Hiray Arts,

Science and Commerce College Panchavati, Nashik-422003, MS, India

**Corresponding Author**

**Dr. Vishnu A. Adole**

Department of Chemistry, Mahatma Gandhi Vidyamandir's Loknete Vyankatrao Hiray Arts,  
Science and Commerce College Panchavati, Nashik-422003, MH, India

(Affiliated to Savitribai Phule Pune University, Pune)

**Email:** [vishnuadole86@gmail.com](mailto:vishnuadole86@gmail.com)

**ORCID Id:** 0000-0001-7691-7884

## 1. Experimental

### 1.1. General Remarks

All chemical reagents in high purity were purchased (*Make: Sigma-Aldrich, Merck, SD fine chemicals and Avra synthesis*) and used without any further purification. The FT-IR,  $^1\text{H}$  NMR and  $^{13}\text{C}$  NMR spectral analyses were performed on a Bruker using  $\text{CDCl}_3$  and  $\text{DMSO-d}_6$  as solvents. The FT-IR spectroscopic analysis was recorded on Bruker with KBr pellets. Melting points were determined in open capillaries and uncorrected. All the glass apparatus were dried prior to use.

### 1.2. Preparation of lemon juice

Fresh lemon we taken and washed it thoroughly with water and cut by using a knife and then pieces where pressed manually. Then, the juice was filtered to remove solid material and to get clear juice which was used as a catalyst (**Figure S1**).

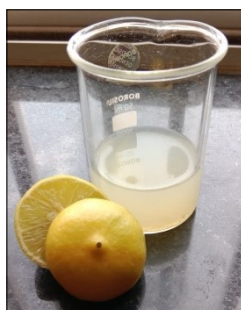

**Figure S1:** Preparation of lemon juice

### 1.3. Synthesis of 2-aryl/heteroaryl substituted quinoxalin-4(1H)-ones

A mixture of anthranilamide (**1**, 0.01 mol) and aryl/heteroaryl aldehyde (**2**, 0.01 mol) and lemon juice (0.3 mL) were mixed in a 50 mL conical flask (fitted with condenser) containing ethyl alcohol as a solvent. This mixture was exposed concentrated solar radiation for an appropriate time (monitored by TLC) (**Figure S2**). The mixture is then cooled to room temperature and to this ethanol was added. The reaction mixture was then filtered to get pure products (**Scheme 1**). The structures of all products were confirmed by using spectroscopic data such as FT-IR,  $^1\text{H}$  NMR and  $^{13}\text{C}$  NMR spectral data.

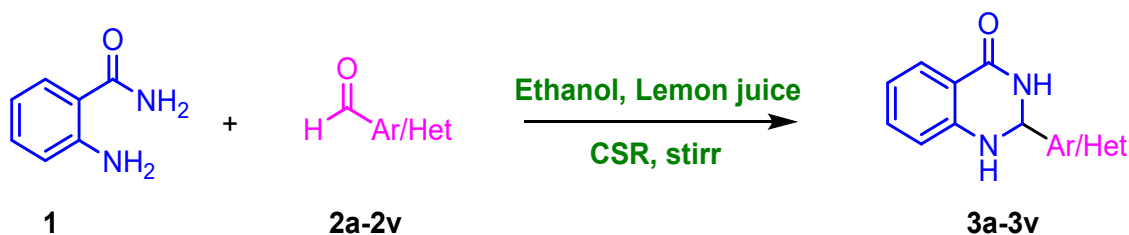

**Scheme 1** Synthesis of 2-aryl/heteroaryl substituted quinoxalin-4(1H)-ones

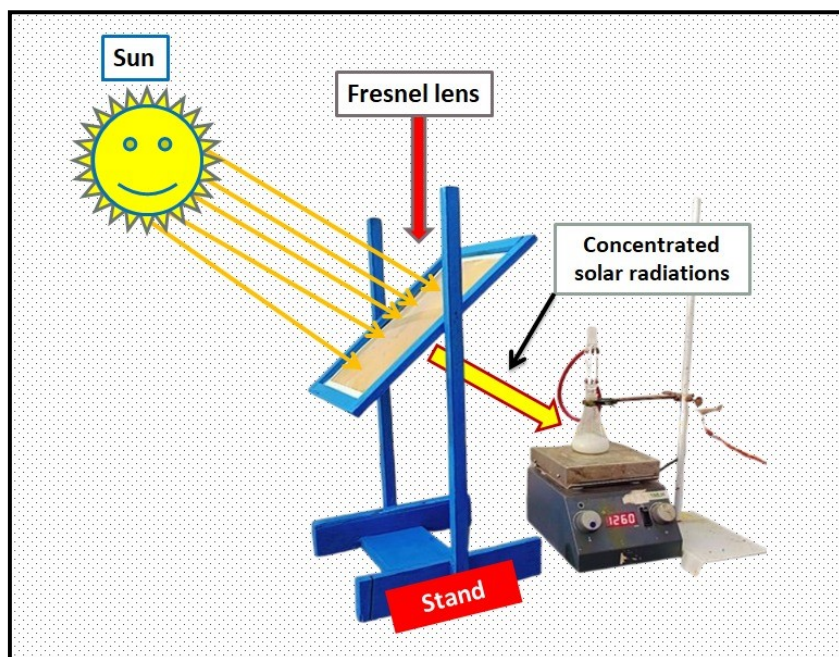

**Figure S2** Diagram showing CSR for the synthesis of 2,3-dihydroquinazolin-4(1*H*)-one

## 2. Representative Spectral results

### 2.1.1. 2-phenyl-2,3-dihydroquinazolin-4(1*H*)-one

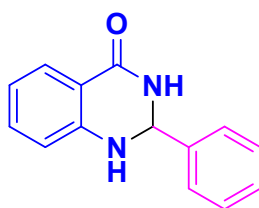

**FT-IR (cm<sup>-1</sup>):** 3298.88, 3168.51, 3058.15, 1944.90, 1652.02, 1608.01, 1505.01, 1477.18, 1440.25, 1383.18, 1325.59, 1299.44, 1245.78, 1155.34, 1026.57, 914.83, 857.45, 806.22, 743.81, 693.15, 662.45, 597.67, 564.45.

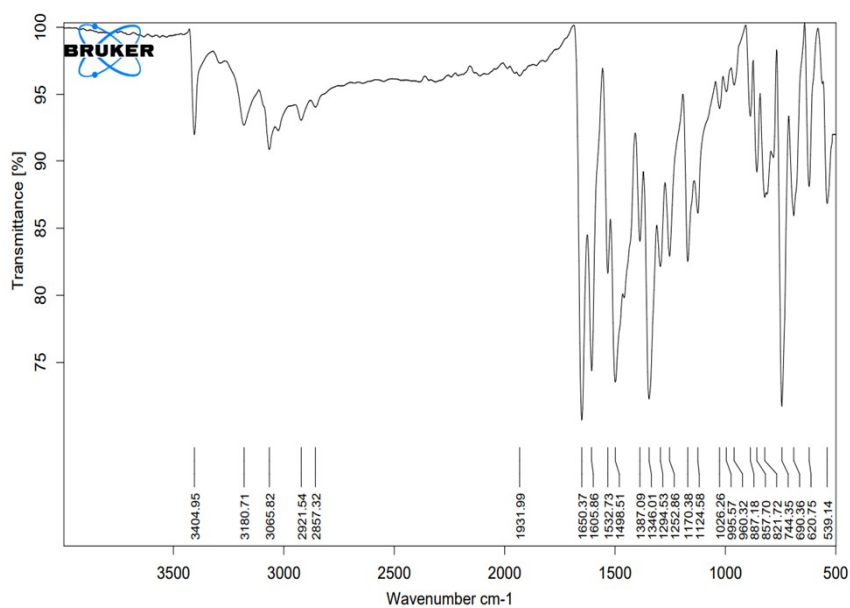

**<sup>1</sup>H NMR (500 MHz, DMSO-d<sub>6</sub>) δ:** 8.28 (t, *J* = 1.7 Hz, 1H), 7.61 (dd, *J* = 7.7, 1.6 Hz, 1H), 7.52 – 7.46 (m, 2H), 7.41 – 7.33 (m, 3H), 7.27 – 7.20 (m, 1H), 7.10 (s, 1H), 6.75 (dd, *J* = 8.2, 1.0 Hz, 1H), 6.71 – 6.64 (m, 1H), 5.75 (t, *J* = 1.7 Hz, 1H)

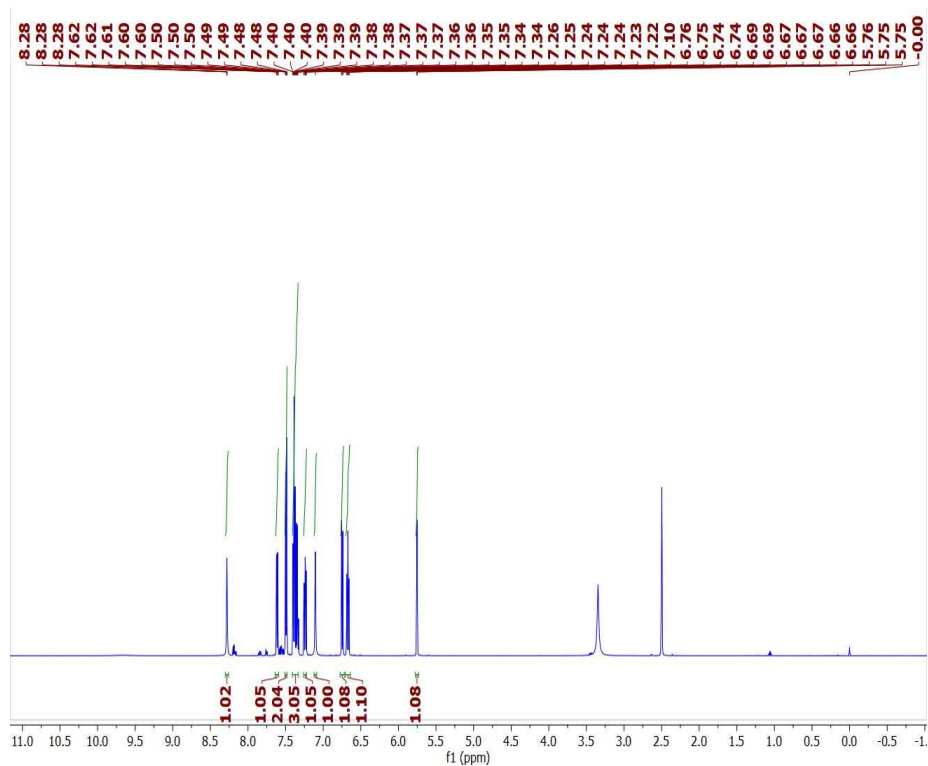

**<sup>13</sup>C NMR (126 MHz, DMSO-d<sub>6</sub>) δ:** 164.06, 148.34, 142.10, 133.78, 128.92, 128.80, 127.82, 127.33, 117.58, 115.42, 114.87, 67.03

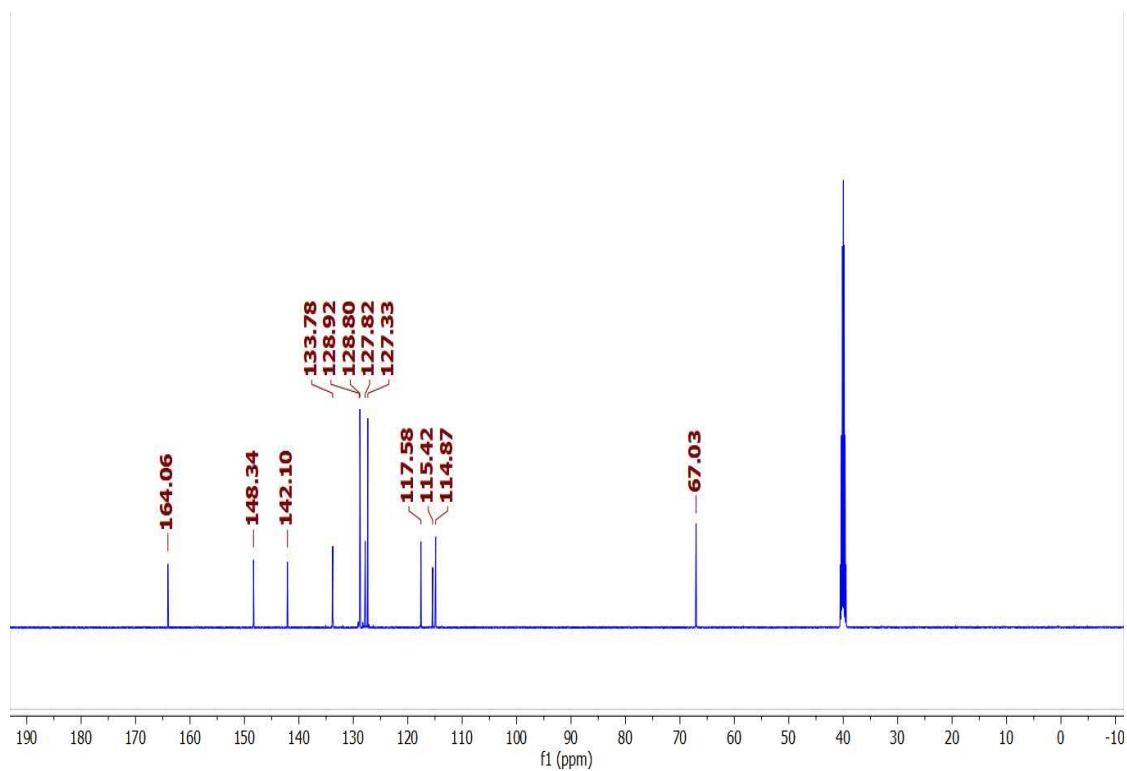

### 2.1.2. 2-(2-(2-butyl-5-chloro-1H-imidazol-4-yl)-2,3-dihydroquinazolin-4(1H)-one

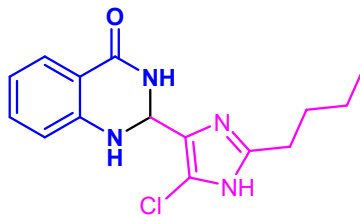

**FT-IR (cm<sup>-1</sup>):** 3275.43, 3182.52, 3059.37, 2932.11, 1648.85, 1610.32, 1514.65, 1482.01, 1433.48, 1375.76, 1326.46, 1295.80, 1231.87, 1156.67, 1129.78, 1088.26, 1028.88, 898.67, 858.89, 802.36, 747.37, 700.38, 657.66, 601.79, 576.71.

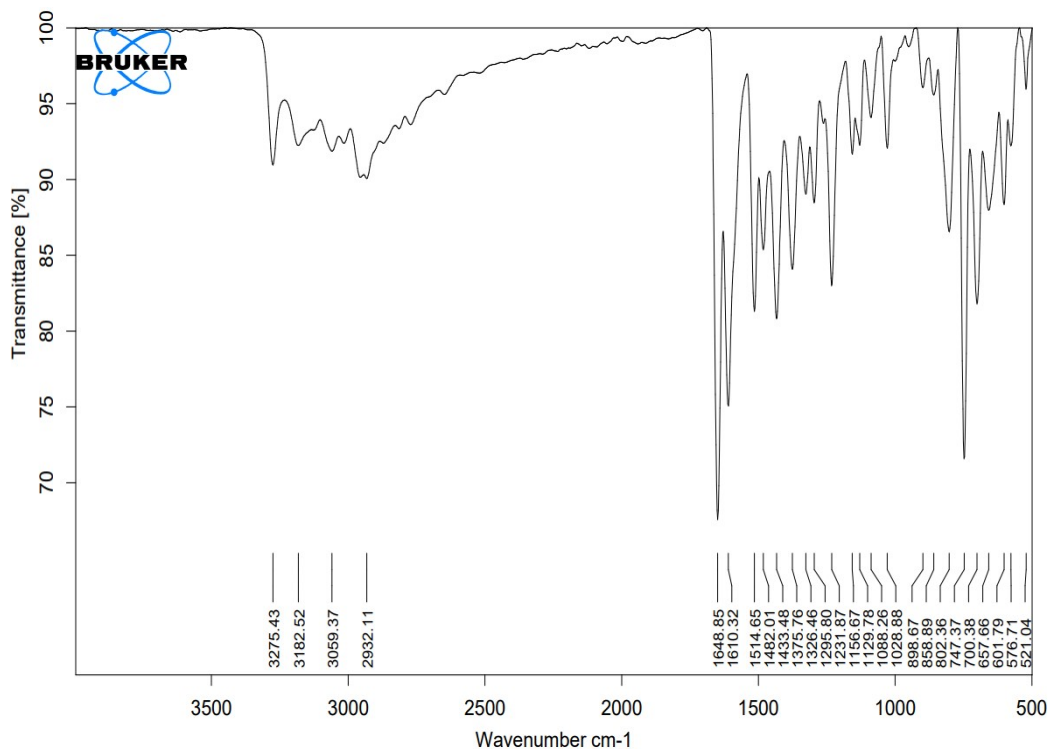

**<sup>1</sup>H NMR (500 MHz, DMSO-d<sub>6</sub>) δ:** δ 12.54 (s, 1H), 8.14 (d, J = 1.7 Hz, 1H), 7.65 (dd, J = 7.7, 1.6 Hz, 1H), 7.28 (ddd, J = 8.1, 7.2, 1.6 Hz, 1H), 6.95 (d, J = 1.6 Hz, 1H), 6.78 – 6.70 (m, 2H), 5.83 (s, 1H), 2.57 (t, J = 7.5 Hz, 2H), 1.60 (quin, J = 7.5 Hz, 2H), 1.31 (sext, J = 7.5 Hz, 2H), 0.89 (t, J = 7.5 Hz, 3H)

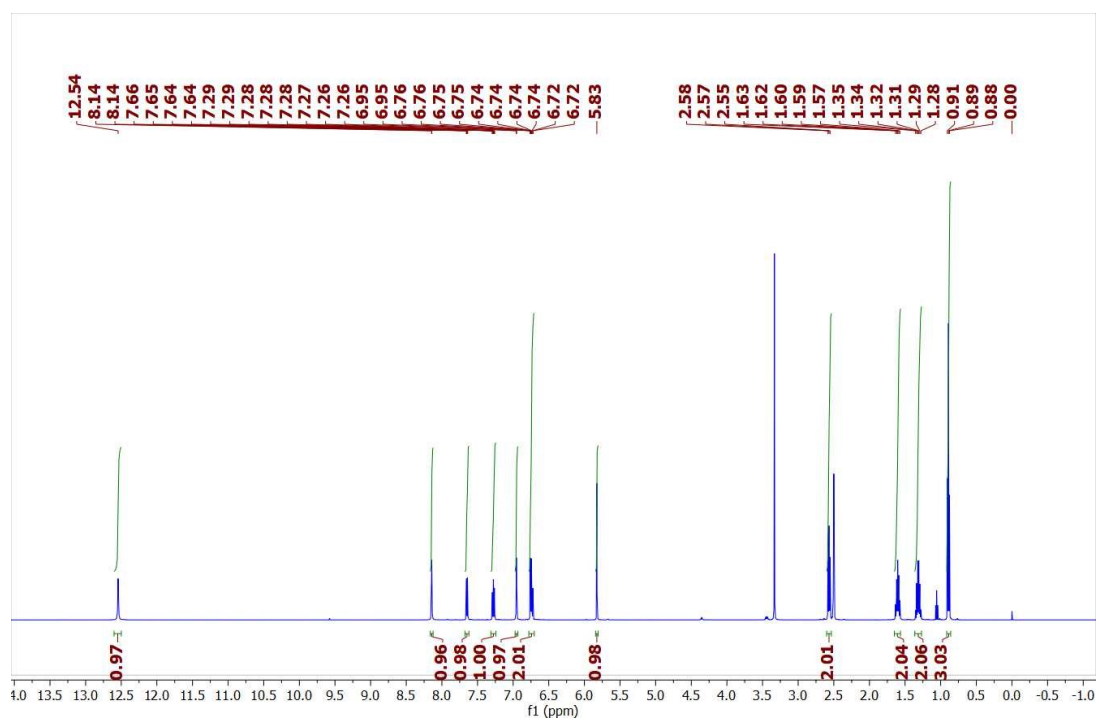

<sup>13</sup>C NMR (126 MHz, DMSO-d<sub>6</sub>) δ: 164.34, 148.70, 148.46, 133.74, 127.94, 126.19, 122.32, 118.21, 115.50, 114.98, 59.49, 30.45, 27.99, 22.07, 14.13

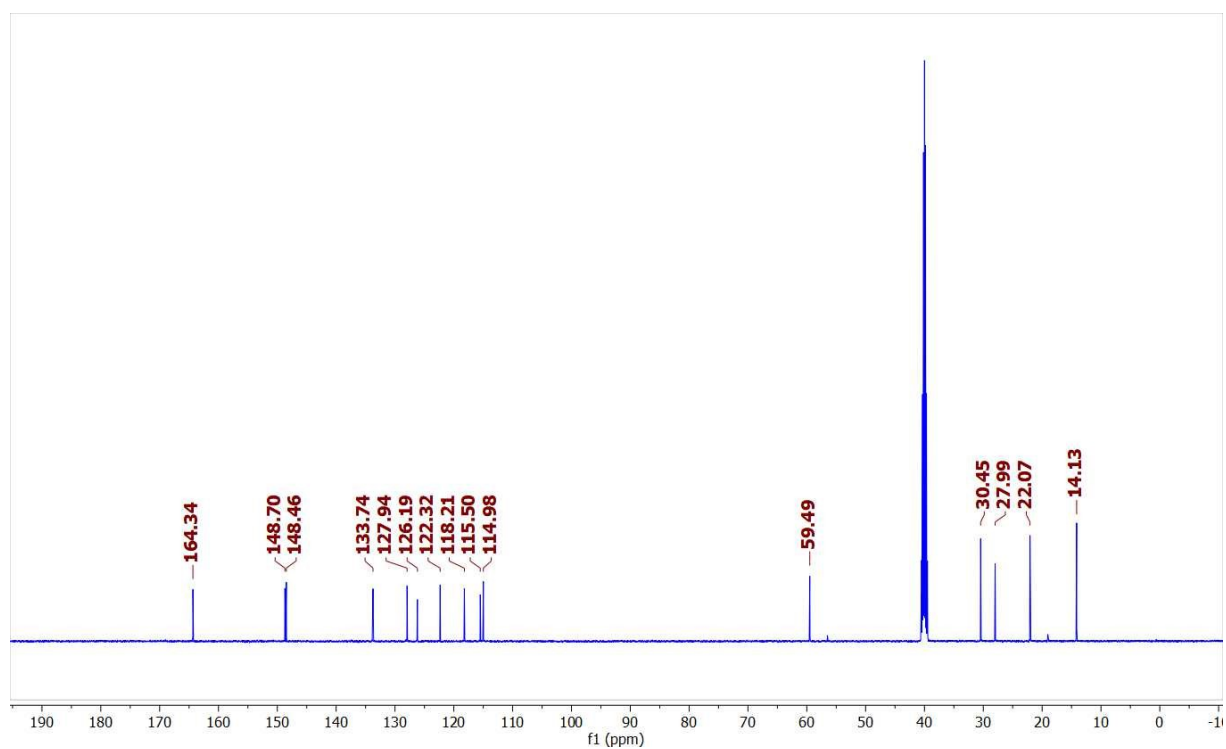

### 2.1.3. 2-(1-methyl-1H-pyrrol-2-yl)-2,3-dihydroquinazolin-4(1H)-one

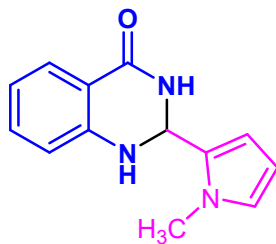

**FT-IR (cm<sup>-1</sup>):** 3388.61, 3173.70, 3124.59, 3002.97, 2907.24, 2108.31, 1948.29, 1637.14, 1607.09, 1488.31, 1372.03, 1295.18, 1240.26, 1156.89, 1093.31, 1022.02, 984.98, 948.40, 858.10, 814.11, 767.84, 728.14, 603.62, 542.33.

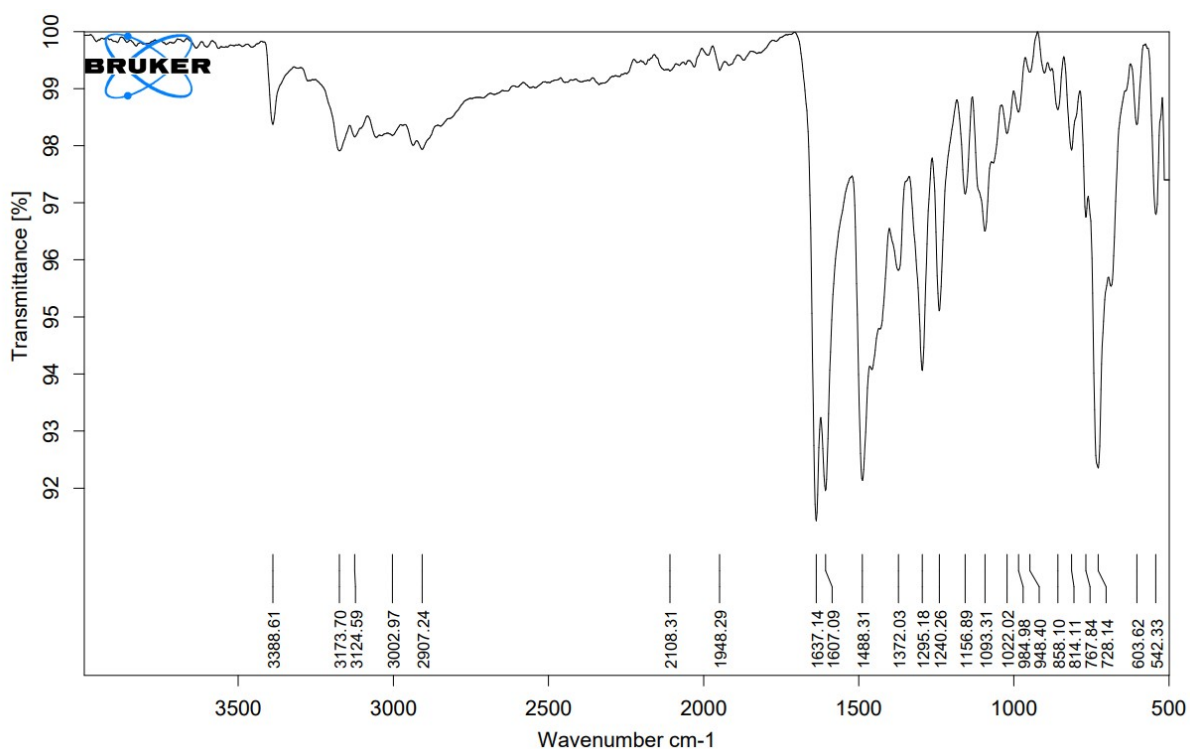

**<sup>1</sup>H NMR (500 MHz, DMSO-d<sub>6</sub>) δ:** 8.14 (t, J = 1.7 Hz, 1H), 7.63 (dd, J = 7.8, 1.6 Hz, 1H), 7.24 (ddd, J = 8.1, 7.2, 1.6 Hz, 1H), 6.92 (d, J = 1.8 Hz, 1H), 6.77 (dd, J = 8.2, 1.1 Hz, 1H), 6.74 (dd, J = 2.7, 1.9 Hz, 1H), 6.70 (ddd, J = 8.0, 7.2, 1.1 Hz, 1H), 6.06 (dd, J = 3.6, 1.9 Hz, 1H), 5.91 (dd, J = 3.6, 2.7 Hz, 1H), 5.87 (t, J = 1.5 Hz, 1H), 3.70 (s, 3H)

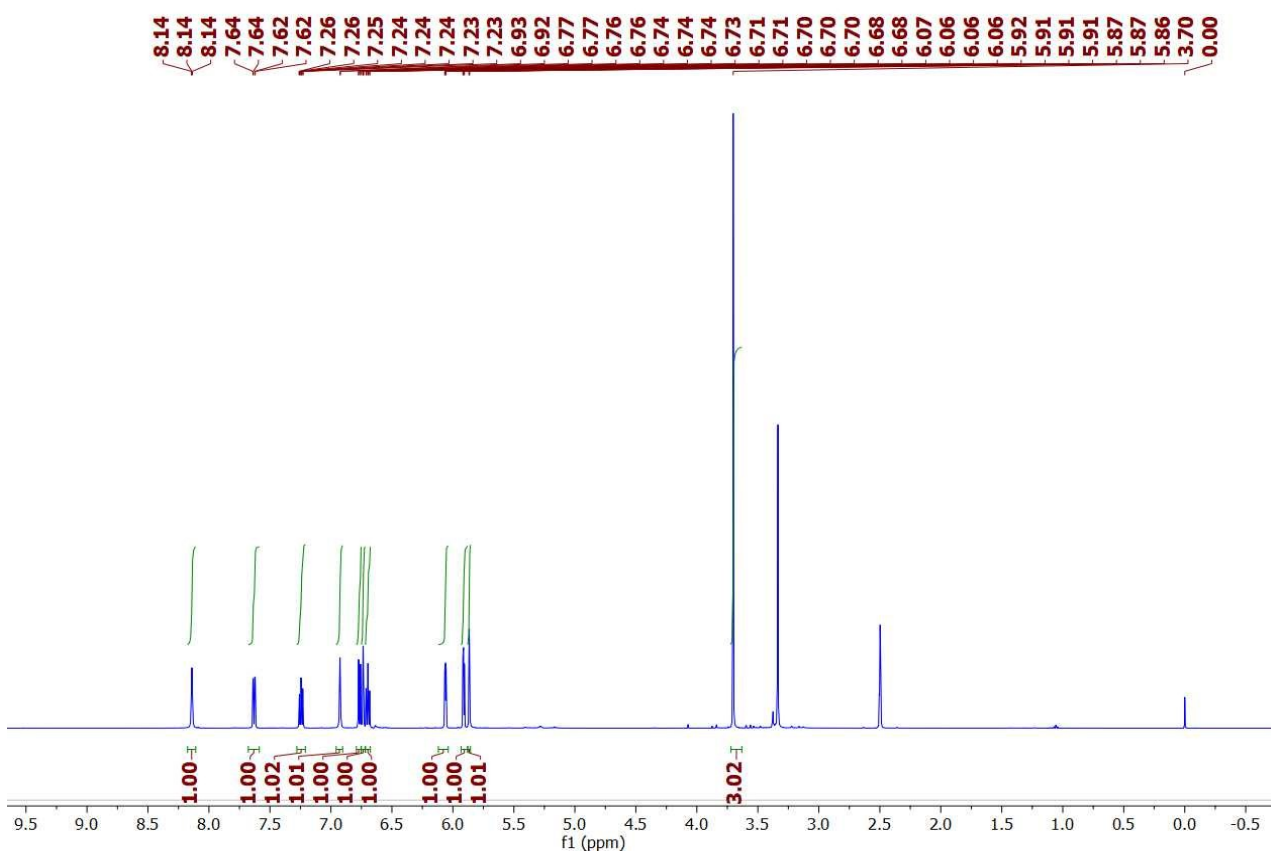

**$^{13}\text{C}$  NMR (126 MHz, DMSO- $d_6$ )  $\delta$ : 164.43, 148.67, 133.57, 130.64, 127.84, 124.37, 117.75, 115.70, 115.08, 109.31, 106.46, 61.22, 34.80**

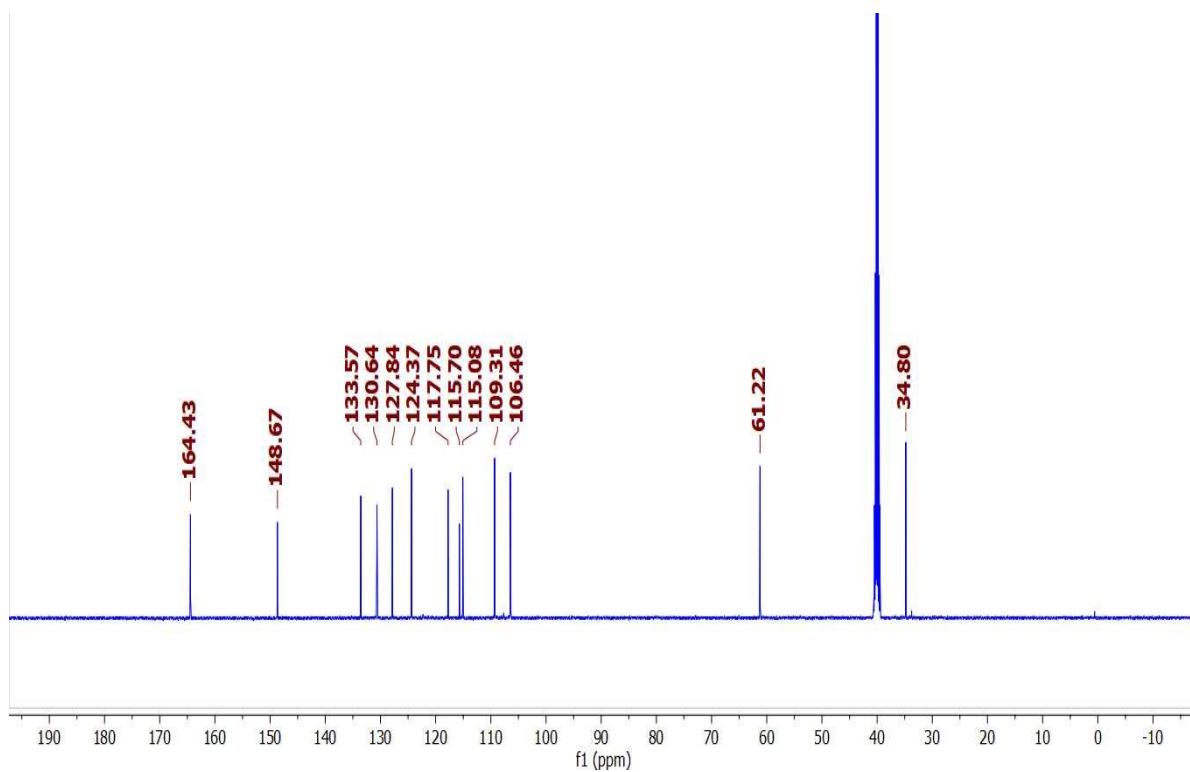



2.1.4. 2-(2,3-dihydrobenzo[b][1,4]dioxin-6-yl)-2,3-dihydroquinazolin-4(1H)-one

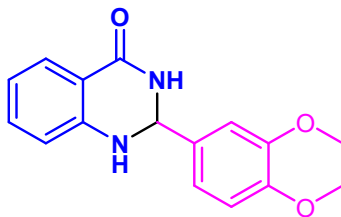

**FT-IR (cm<sup>-1</sup>):** 3291.13, 3183.76, 3023.70, 2925.35, 1644.47, 1611.19, 1500.94, 1458.36, 1397.38, 1285.95, 1256.95, 1154.57, 1124.00, 1065.59, 913.70, 876.03, 761.55, 679.57, 645.64, 594.75, 555.71, 525.16

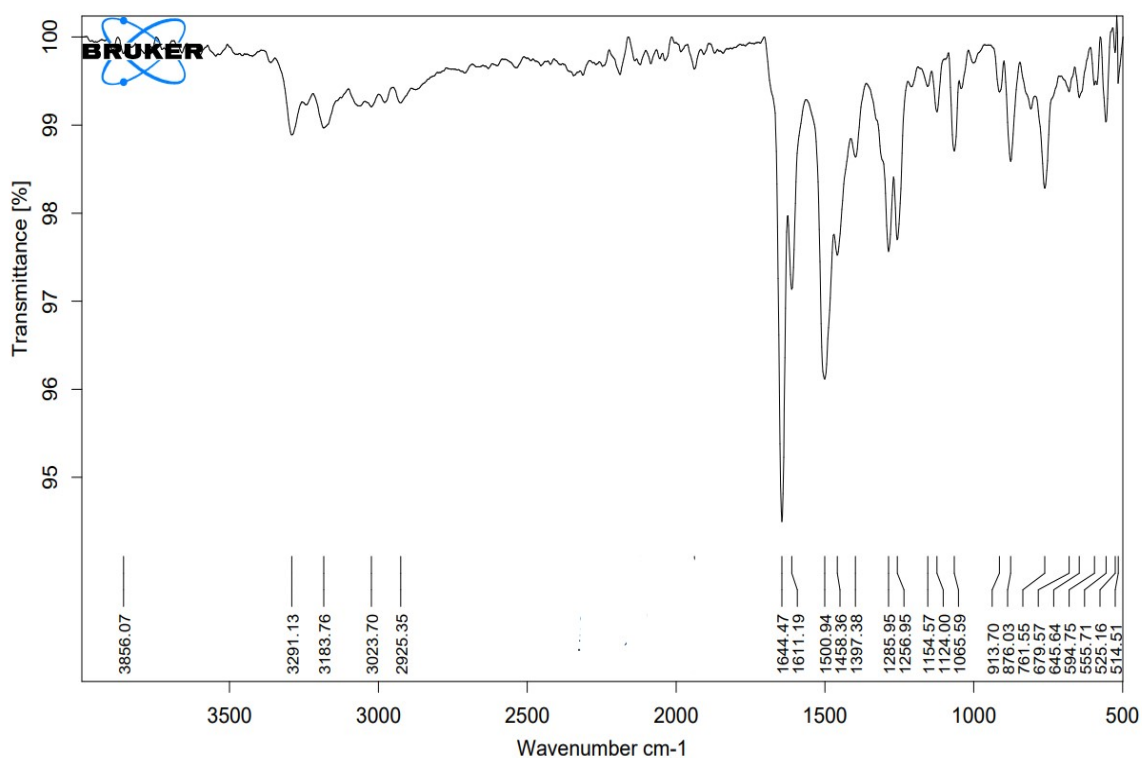

**<sup>1</sup>H NMR (500 MHz, DMSO-d<sub>6</sub>)** δ 8.30 – 8.19 (m, 1H), 7.59 (dd, J = 7.8, 1.6 Hz, 1H), 7.23 (ddd, J = 8.1, 7.2, 1.7 Hz, 1H), 7.04 (d, J = 1.8 Hz, 1H), 6.98 – 6.90 (m, 2H), 6.85 (d, J = 8.3 Hz, 1H), 6.73 (dd, J = 8.2, 1.1 Hz, 1H), 6.69 – 6.63 (m, 1H), 5.63 (t, J = 2.0 Hz, 1H), 4.21 (s, 4H)

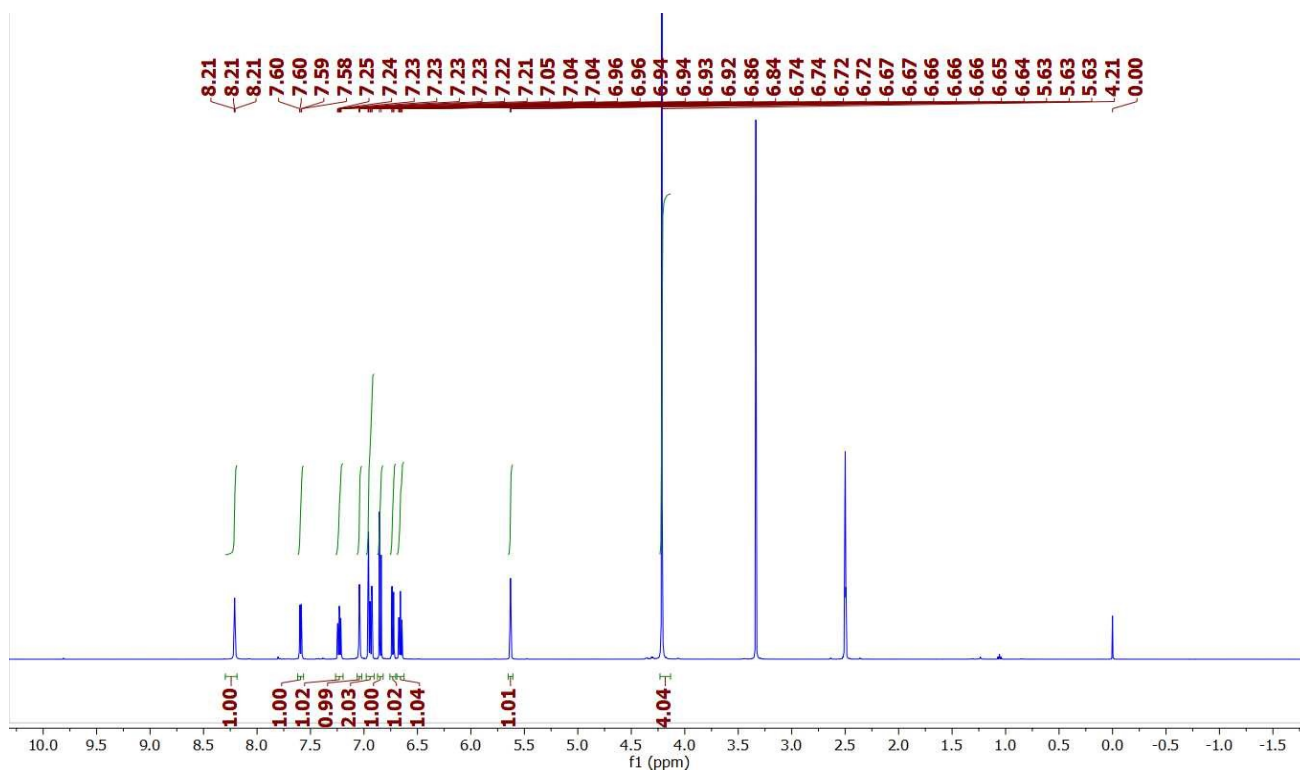

$^{13}\text{C}$  NMR (126 MHz, DMSO- $d_6$ )  $\delta$  164.03, 148.27, 143.90, 143.47, 135.32, 133.74, 127.79, 120.07, 117.52, 117.26, 116.05, 115.43, 114.87, 66.33, 64.55

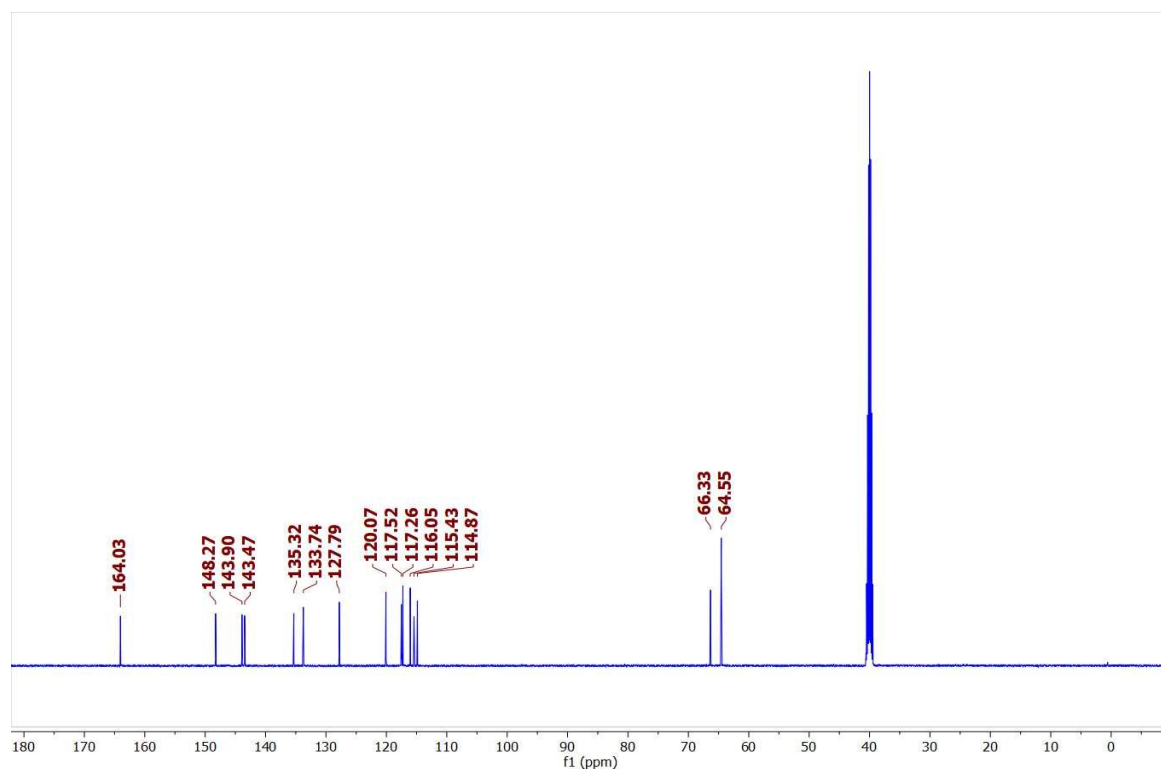

2.1.5. 2-(4-methylthiazol-5-yl)-2,3-dihydroquinazolin-4(1H)-one

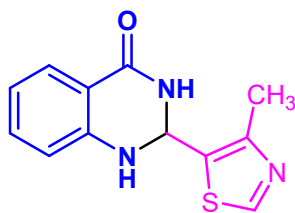

**FT-IR (cm<sup>-1</sup>):** 3291.98, 3181.92, 1652.76, 1611.68, 1558.01, 1508.26, 1482.35, 1439.42, 1407.17, 1374.01, 1330.96, 1287.06, 1160.93, 1128.89, 1028.63, 995.66, 944.22, 855.56, 808.94, 746.88, 689.10, 597.71, 534.07

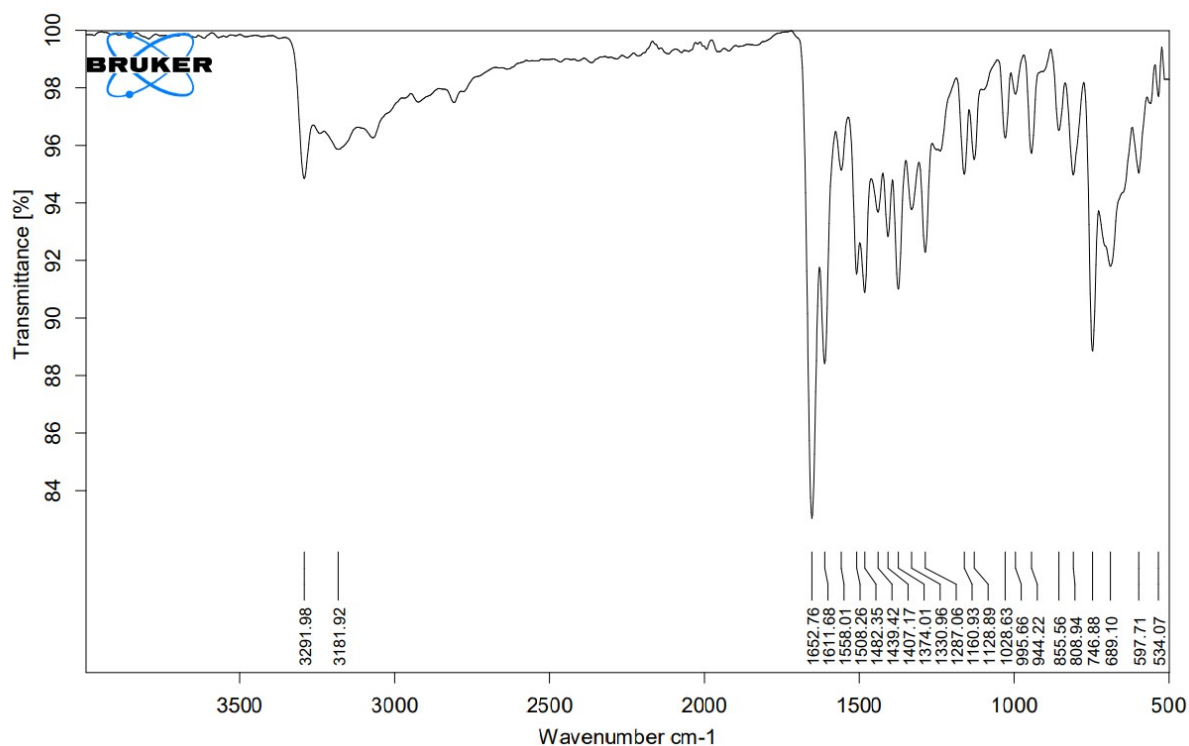

**<sup>1</sup>H NMR (500 MHz, DMSO-d<sub>6</sub>)** δ 8.91 (s, 1H), 8.33 (s, 1H), 7.68 – 7.62 (m, 1H), 7.32 – 7.25 (m, 1H), 7.13 (s, 1H), 6.79 – 6.72 (m, 2H), 6.18 (s, 1H), 2.49 (s, 3H)

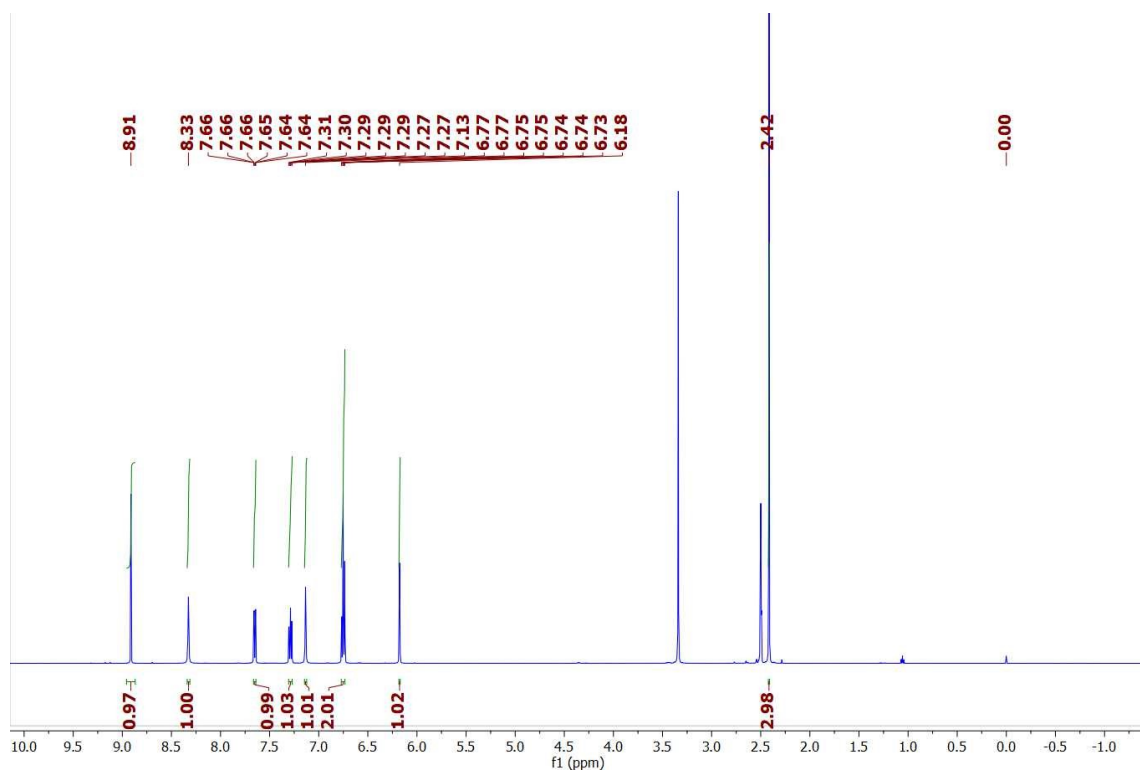

<sup>13</sup>C NMR (126 MHz, DMSO-d<sub>6</sub>) δ 163.73, 152.88, 150.38, 147.98, 133.93, 132.93, 127.83, 118.36, 115.55, 115.17, 61.06, 15.66

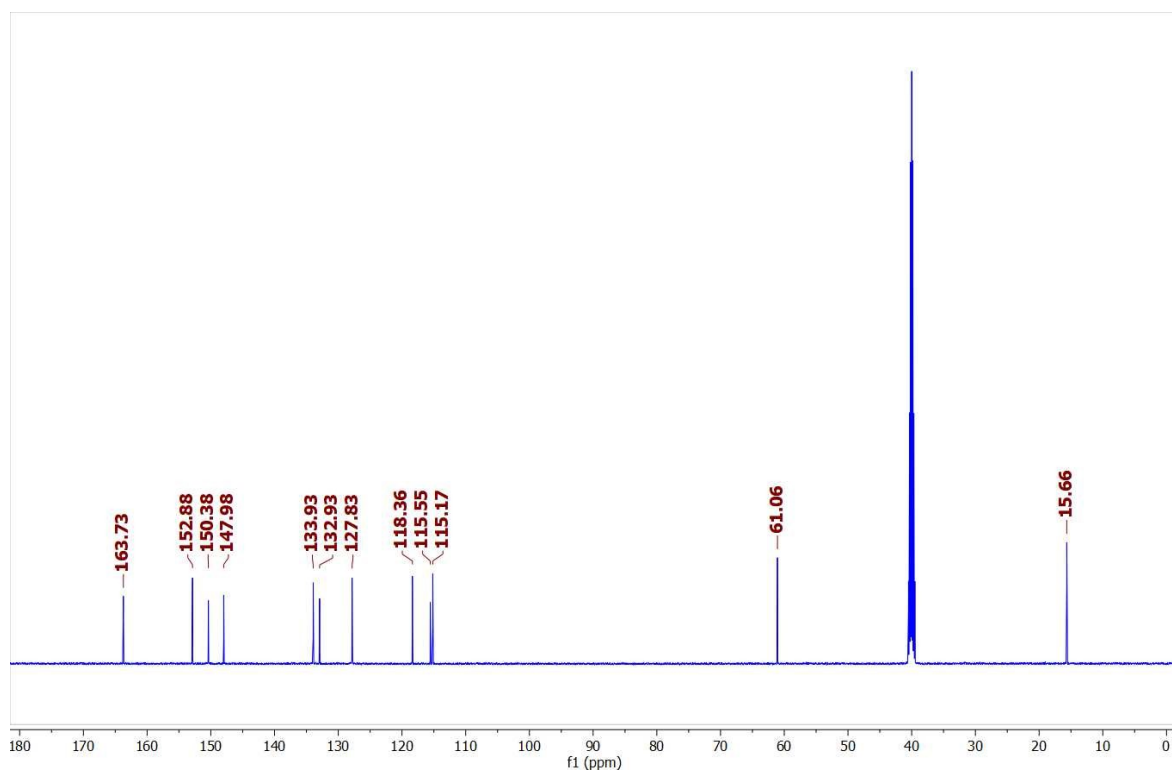

2.1.6. 2-(4-oxo-4H-chromen-3-yl)-2,3-dihydroquinazolin-4(1H)-one

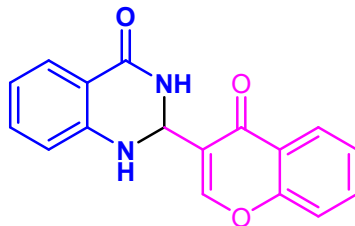

3189.26, 3129.54, 3066.13, 1674.41, 1592.86, 1558.79, 1501.99, 1471.87, 1364.67, 1333.19, 1284.57, 1230.46, 1131.54, 1074.29, 1025.38, 943.83, 899.09, 872.38, 822.90, 765.80, 737.70, 701.46, 647.86, 612.34, 563.46.

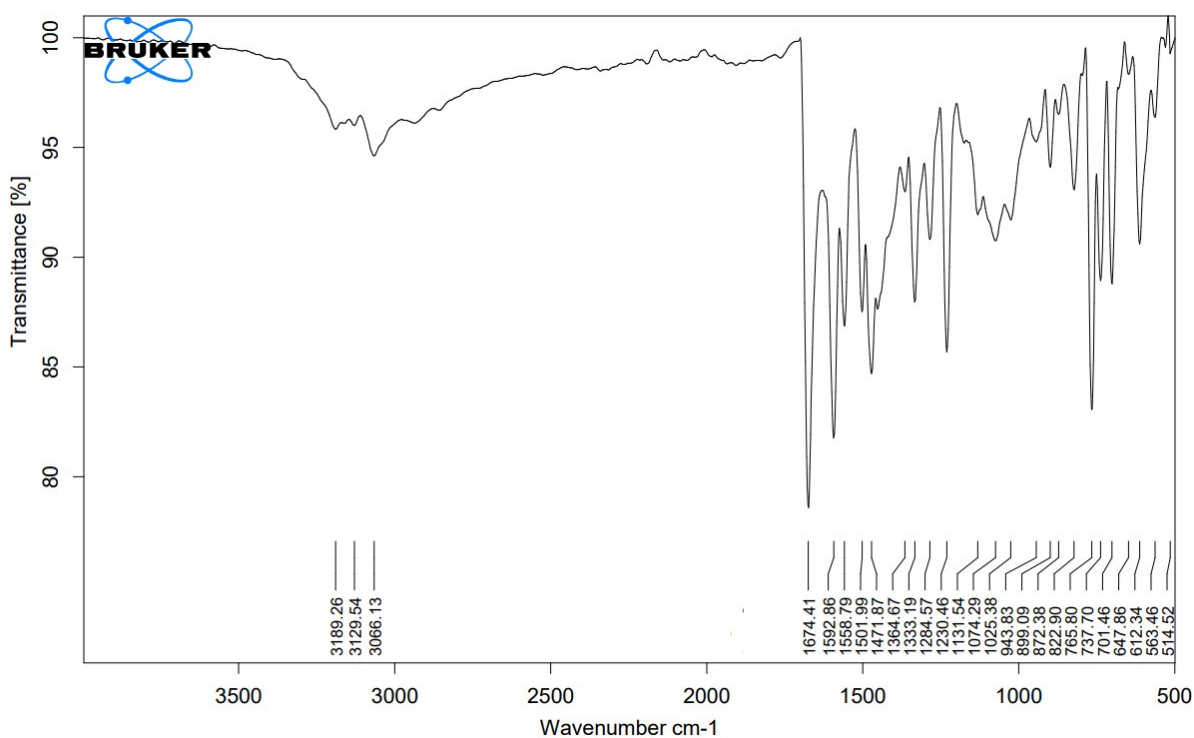

<sup>1</sup>H NMR (500 MHz, DMSO-d<sub>6</sub>) δ 8.40 (d, *J* = 0.6 Hz, 1H), 8.13 – 8.06 (m, 2H), 7.84 (ddd, *J* = 8.7, 7.2, 1.7 Hz, 1H), 7.67 (td, *J* = 8.2, 1.0 Hz, 2H), 7.54 (ddd, *J* = 8.1, 7.2, 1.0 Hz, 1H), 7.26 (ddd, *J* = 8.2, 7.2, 1.6 Hz, 1H), 6.87 (s, 1H), 6.81 – 6.78 (m, 1H), 6.74 – 6.68 (m, 1H), 5.96 (s, 1H).

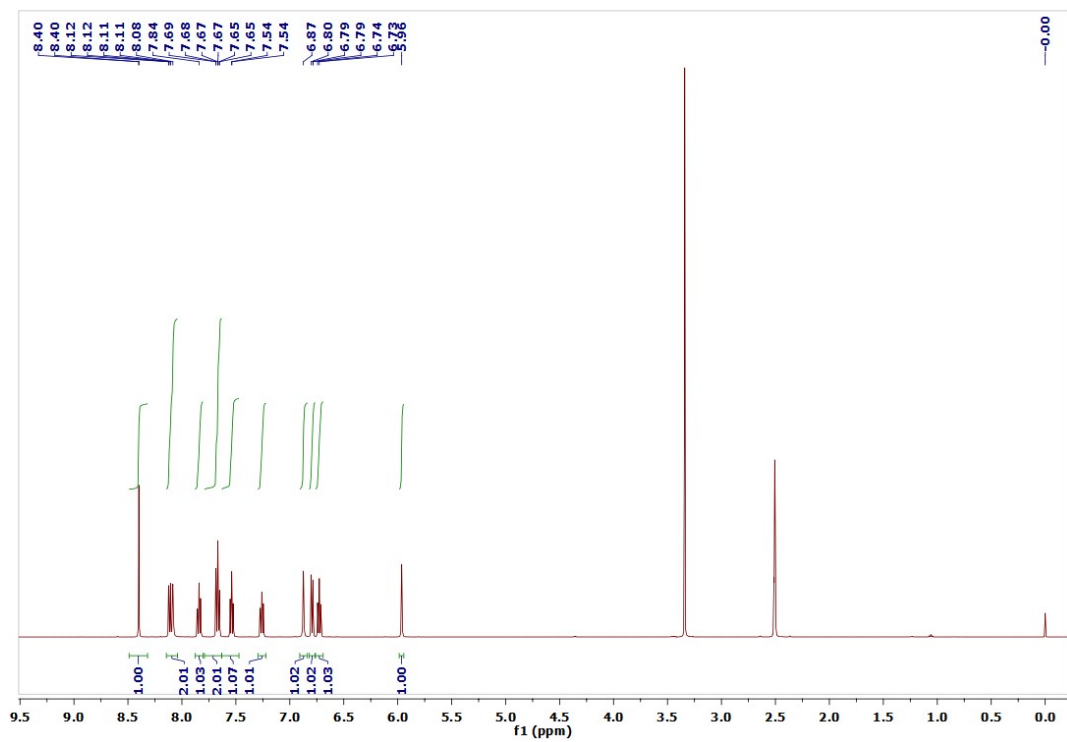

<sup>13</sup>C NMR (126 MHz, DMSO-d<sub>6</sub>) δ 175.94, 164.10, 156.18, 155.78, 148.14, 135.10, 133.84, 127.92, 126.33, 125.54, 123.72, 123.43, 119.02, 118.09, 115.34, 115.29, 60.01.

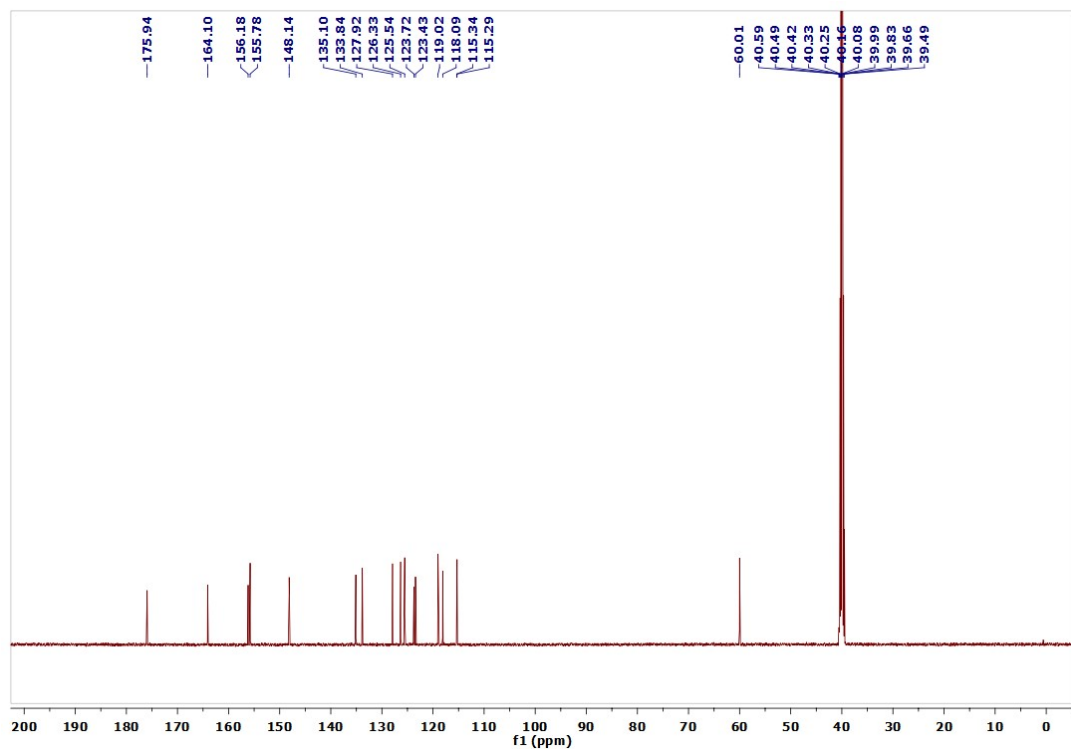

Supplement: d4ra05772d1.pdf [file d4ra05772d1.pdf]
